# Supplementary material for: Alkaline stress and iron deficiency regulate iron uptake and riboflavin synthesis gene expression differently in root and leaf tissue: implications for iron deficiency chlorosis
Source: PubMed Central journal article supplement (PMC5066488; doi:10.1093/jxb/erw328), 2016-09-07
Supplement: supp_erw328_Supplementary_Table_S1_Supplementary_Figures_S1_S2.pdf [file supp_erw328_Supplementary_Table_S1_Supplementary_Figures_S1_S2.pdf]

# Alkaline stress and iron deficiency regulate iron uptake and riboflavin synthesis gene expression differently in root and leaf tissue: Implications for iron deficiency chlorosis (IDC)

En-Jung Hsieh and Brian M. Waters

## Supplementary data

**Table S1.** Primers used in this study.

| Gene name    | Primer sequence 5' → 3'  |
|--------------|--------------------------|
| Ubiquitin F  | TCTTTCTTGGCCTCGTGCTCTTCT |
| Ubiquitin R  | TTGCAGATGCGTGGAATCGACAAC |
| CsbHHLH38 F  | GTGGAAGAGCAGATGAGGAAG    |
| CsbHHLH38 R  | TGCGGAAATGATCGATGAGG     |
| CsbHHLH101 F | GTGCTGTGAATTGGCTTAGTG    |
| CsbHHLH101 R | AGGATCGAAAAGAGGAAGCAG    |
| CmFRO1 F     | TCACAGCGATTTAGAACCAGA    |
| CmFRO1 R     | GCCTTCGAGGGAAACTTGAA     |
| CmFIT F      | GACATCAACGATCAATTTGAGC   |
| CmFIT R      | CGATCCTCGATCAAGCAAC      |
| CmIRT1 F     | AAACCGGTGGCGAGAATGATACCT |
| CmIRT1 R     | ACTCCAATGTTGCACCCGGATAGA |
| CmNRAMP1 F   | CTGTAATAGCAGCCGATATTCC   |
| CmNRAMP1 R   | CTATCAACAGTTCAGCTTCC     |
| CsRIBA1 F    | TGAAGCCTCTGTGACCTTG      |
| CsRIBA1 R    | CGAAGCTTGGGGAGTCTAGC     |
| CsCmPYRD F   | GGCGTGCAACGACTAAGAGA     |
| CsCmPYRD R   | GTGAGAAGAGGCTTCCCAGTC    |
| CsPHS1 F     | GCCTCCTTGTTAATGCTCCA     |
| CsPHS1 R     | CGATGTCGAGATGTAACGCT     |
| CsDMRLs F    | GGTCCCAGGGAGCTTTGATA     |
| CsDMRLs R    | ACAACGGCATCATAGTGGGA     |
| Cm bHLH38 F  | AACAACAAGTGGAAGGGCAG     |
| Cm bHLH38 R  | CGAAGCTGCGGATTTTCATTTT   |
| Cm bHLH101 F | TCCAGAGCTTCAACAGCAAG     |
| Cm bHLH101 R | AGCACACAAAGAACTCATCCA    |
| CmRIBA1 F    | TGGCATTGGCATCAAAACAC     |
| CmRIBA1 R    | GCCTTTTCAAAACCCCTCCT     |
| CmPHS1 F     | CGAGGAAGAAGCGATGCTAT     |
| CmPHS1 R     | ACATCACAAACACGAACAGGA    |
| CmDMRLs F    | AGAAAGTCAAGCGAGGAGAAT    |
| CmDMRLs R    | GAGGCCGCCATTATCAACTC     |
| CsCmRIBC     | ACTGCTTTTGACCACCAACT     |
| CsCmRIBC     | CCATTGCGCTGATTGGTTGA     |

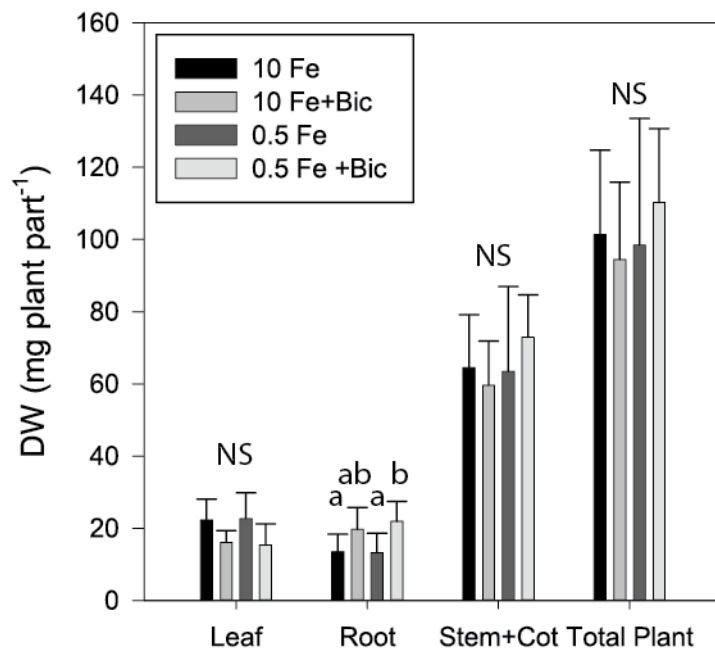

**Fig. S1.** DW of cucumber plants. Cucumber (cv. Ashley) seedlings were transferred into hydroponics with 0.5 or 10  $\mu\text{M}$  Fe for 4 days pretreatment, and then treated with or without 10 mM bicarbonate for 3 days. The roots, first leaf, and stem+cotyledons of each plant were harvested separately and DW was measured. Total Plant DW is the sum of plant parts. Bars represent mean  $\pm$  s.d. ( $n=8$ ). Different letters indicate significant differences ( $P < 0.05$ ) based on ANOVA using the Holm-Sidak method, NS indicates no significant differences between treatments.

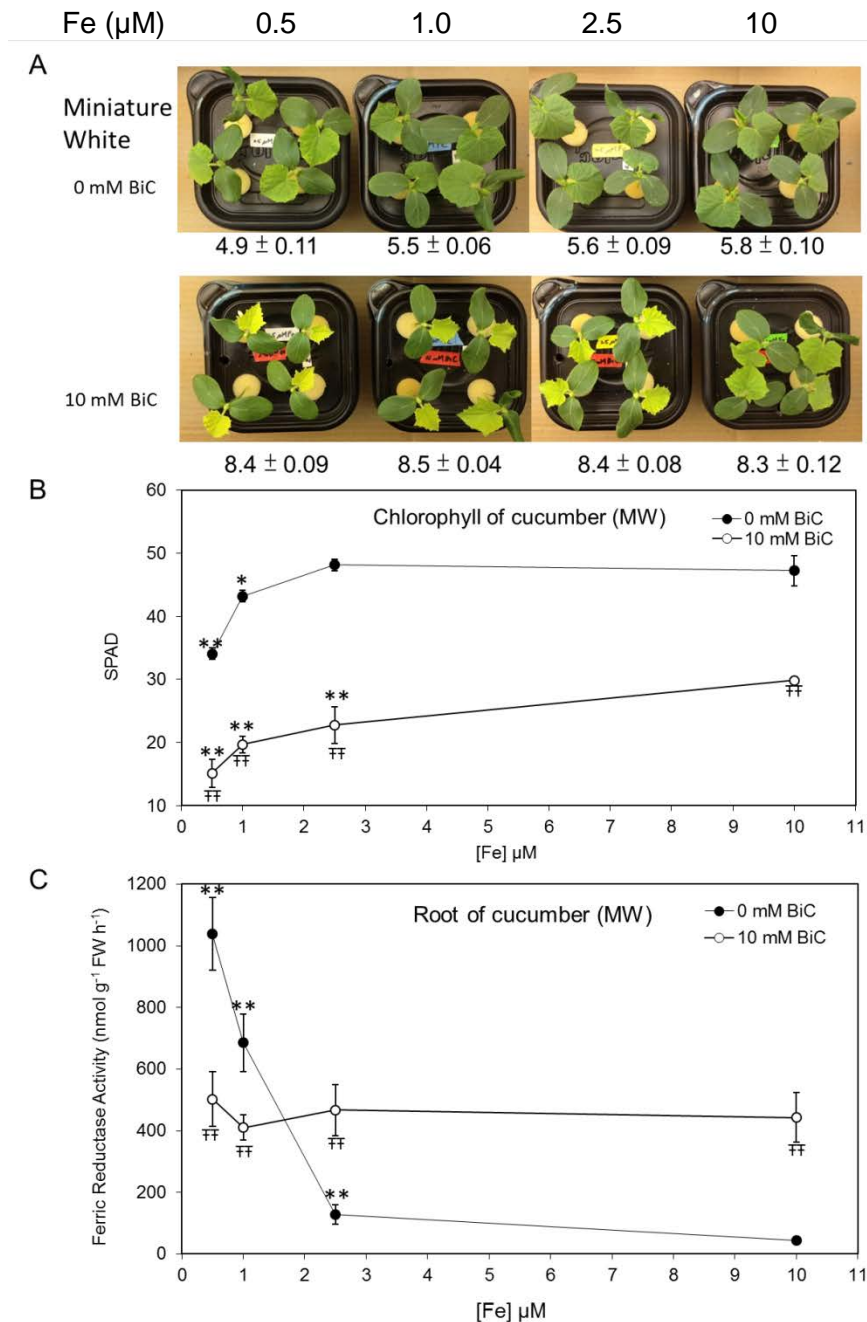

**Fig. S2.** Cucumber (cv Miniature White) leaf chlorophyll and ferric-chelate reductase activity in response to Fe supply in normal pH or alkaline nutrient solution. Cucumber seedlings were pre-treated in hydroponic solution for 4 d with 0.5, 1.0, 2.5, or 10  $\mu\text{M}$  Fe, and then supplied without or with 10 mM bicarbonate for 3 d. (A) Photograph of the plants in each treatment, with final solution pH (means  $\pm$  SD,  $n=6$ ) indicated below photograph. (B) Chlorophyll level of first leaf as measured by Minolta SPAD chlorophyll meter of 10-day-old cucumber plants. (C), Ferric chelate reductase activities of roots, measured after 3 days of treatment. \*, \*\* indicate statistical significance of  $P < 0.05$ ,  $P < 0.01$ , respectively, compared to 10  $\mu\text{M}$  Fe within each curve,. F, FF indicate statistical significance of  $P < 0.05$ ,  $P < 0.01$ , respectively, comparing 10 mM bicarbonate to 0 mM bicarbonate at each Fe supply.
